# Supplementary material
Source: publisher site journal article supplement (https://www.dovepress.com/article/128503)
Supplement: Supplementary file 1 [file get_supplementary_file.php]

**Supporting Information for:**

**Polyphosphoester nanoparticles as biodegradable platform  
for delivery of multiple drugs and siRNA**

Hadeel Elzeny<sup>1†</sup>, Fuwu Zhang<sup>2†</sup>, Esraa N. Ali<sup>1</sup>, Heba A. Fathi<sup>1</sup>, Shiyi Zhang<sup>3</sup>, Richen Li<sup>2</sup>, Mohamed A. El-Mokhtar<sup>4</sup>, Mostafa A. Hamad<sup>5</sup>, Karen L. Wooley<sup>2,6\*</sup> and Mahmoud Elsabahy<sup>1,6-8\*</sup>

<sup>1</sup>Assiut International Center of Nanomedicine, Al-Rajhy Liver Hospital, Assiut University, Assiut, Egypt; <sup>2</sup>Departments of Chemistry, Chemical Engineering and Materials Science & Engineering, Texas A&M University, College Station, Texas, USA; <sup>3</sup>School of Biomedical Engineering, Shanghai Jiao Tong University, Shanghai 200240, China; <sup>4</sup>Department of Microbiology and Immunology, Faculty of Medicine, Assiut University, Assiut, Egypt; <sup>5</sup>Department of Surgery, Faculty of Medicine, Assiut University, Assiut, Egypt; <sup>6</sup>Laboratory for Synthetic-Biologic Interactions, Department of Chemistry, Texas A&M University, College Station, Texas, USA; <sup>7</sup>Department of Pharmaceutics, Faculty of Pharmacy, Assiut University, Assiut, Egypt; <sup>8</sup>Misr University for Science and Technology, 6<sup>th</sup> of October City, Egypt

† These authors contributed equally to the manuscript

Correspondence: Mahmoud Elsabahy ([mahmoud.elsabahy@chem.tamu.edu](mailto:mahmoud.elsabahy@chem.tamu.edu)) and Karen L. Wooley ([wooley@chem.tamu.edu](mailto:wooley@chem.tamu.edu))

Tel.: +201000607466; Fax: +20882080711

**Table S1.** Size and size distribution (PDI) of the neutral PTX-SOR-PPE nanoparticles before and after freeze-drying. Data are presented as mean  $\pm$  SD (n = 3).

| <b>Nanoparticle</b>                   | <b>Particle size (nm)</b> | <b>PDI</b>      |
|---------------------------------------|---------------------------|-----------------|
| Before freeze-drying                  | 31 $\pm$ 1                | 0.39 $\pm$ 0.02 |
| Lyophilization without cryoprotectant | 216 $\pm$ 86              | 0.40 $\pm$ 0.07 |
| Lyophilization with 2% mannitol       | 626 $\pm$ 162             | 0.68 $\pm$ 0.08 |
| Lyophilization with 0.1% mannitol     | 46 $\pm$ 7                | 0.30 $\pm$ 0.00 |

**Table S2.** The effect of different cryoprotectants (Mannitol (1 mg/mL) and sucrose (10 %)) on the size of siRNA-loaded PPE, PEI, chitosan/Tpp nanoparticles.

| Nanoparticle | No cryoprotectant |       | Mannitol |       | Sucrose |       |
|--------------|-------------------|-------|----------|-------|---------|-------|
|              | Before            | After | Before   | After | Before  | After |
| PPE          | 137               | 141   | 155      | 125   | 117     | 208   |
| PEI          | 214               | 247   | 214      | 221   | 214     | 282   |
| Chitosan/Tpp | 244               | 1112  | 181      | 367   | 206     | 247   |

**Table S3.** The effect of different cryoprotectants (Mannitol (1 mg/mL) and sucrose (10 %)) on the PDI of siRNA-loaded PPE, PEI, chitosan/Tpp nanoparticles.

| Nanoparticle | No cryoprotectant |       | Mannitol |       | Sucrose |       |
|--------------|-------------------|-------|----------|-------|---------|-------|
|              | Before            | After | Before   | After | Before  | After |
| PPE          | 0.19              | 0.29  | 0.17     | 0.52  | 0.19    | 0.20  |
| PEI          | 0.48              | 0.35  | 0.48     | 0.31  | 0.48    | 0.57  |
| Chitosan/Tpp | 0.41              | 0.23  | 0.31     | 0.32  | 0.27    | 0.43  |

**Table S4.** Size, size distribution (PDI) and Zeta-potential measurements of the cationic and neutral PPE nanoparticles complexed with siRNA or loaded with sorafenib (SOR) and (PTX), respectively. The PPE-based cationic and neutral nanoparticles were measured either separately or mixed (with and without further dilution). Data are presented as mean  $\pm$  SD (n = 3).

| <b>Nanoparticle</b>                                                                              | <b>Particle size (nm)</b> | <b>PDI</b>       | <b>Zeta-potential (mV)</b> |
|--------------------------------------------------------------------------------------------------|---------------------------|------------------|----------------------------|
| <b>PTX-SOR-PPE nanoparticles<br/>Before mixing</b>                                               | 45 $\pm$ 1                | 0.29 $\pm$ 0.003 | -34.2 $\pm$ 1.2            |
| <b>siRNA-PPE nanoparticles<br/>Before mixing</b>                                                 | 160 $\pm$ 5               | 0.40 $\pm$ 0.006 | 21.6 $\pm$ 0.5             |
| <b>PTX-SOR-PPE/siRNA-PPE nanoparticles<br/>(1:1 in water)</b>                                    | 83 $\pm$ 1                | 0.58 $\pm$ 0.010 | -2.9 $\pm$ 1.2             |
| <b>PTX-SOR-PPE/siRNA-PPE nanoparticles<br/>(1:1 in water and 5 <math>\times</math> dilution)</b> | 74 $\pm$ 1                | 0.40 $\pm$ 0.004 | -6.9 $\pm$ 0.4             |

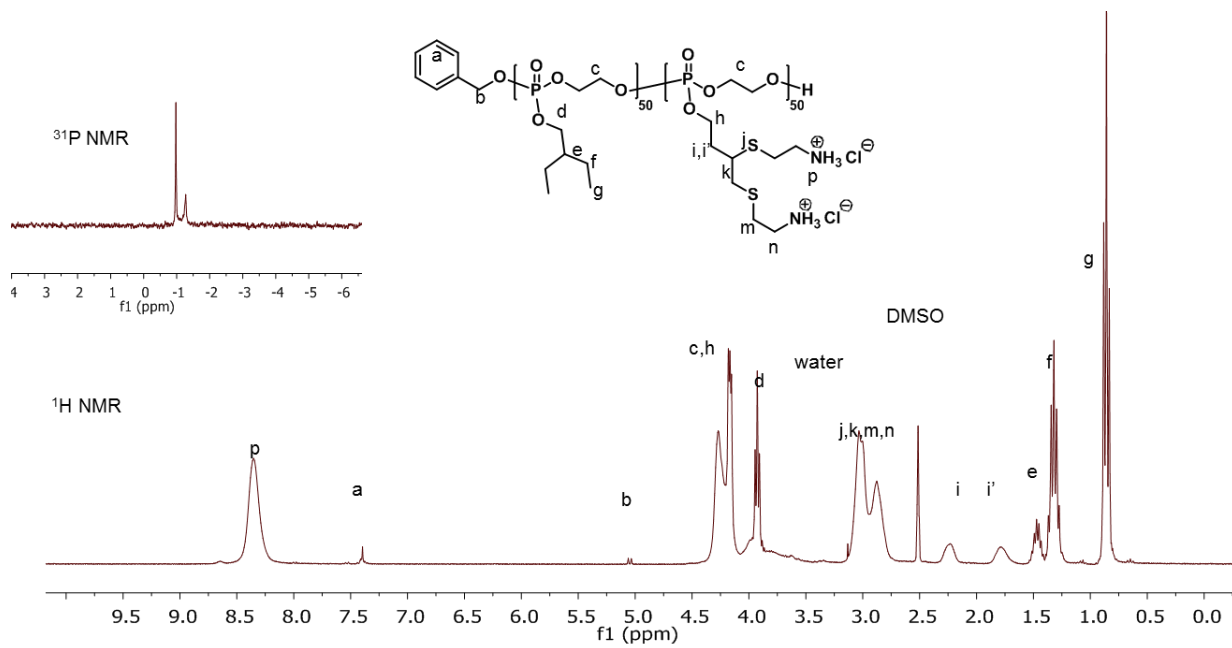

**Figure S1.**  $^1\text{H}$  NMR and  $^{31}\text{P}$  NMR of cationic block copolymer PEBP-*b*-PBYP-C

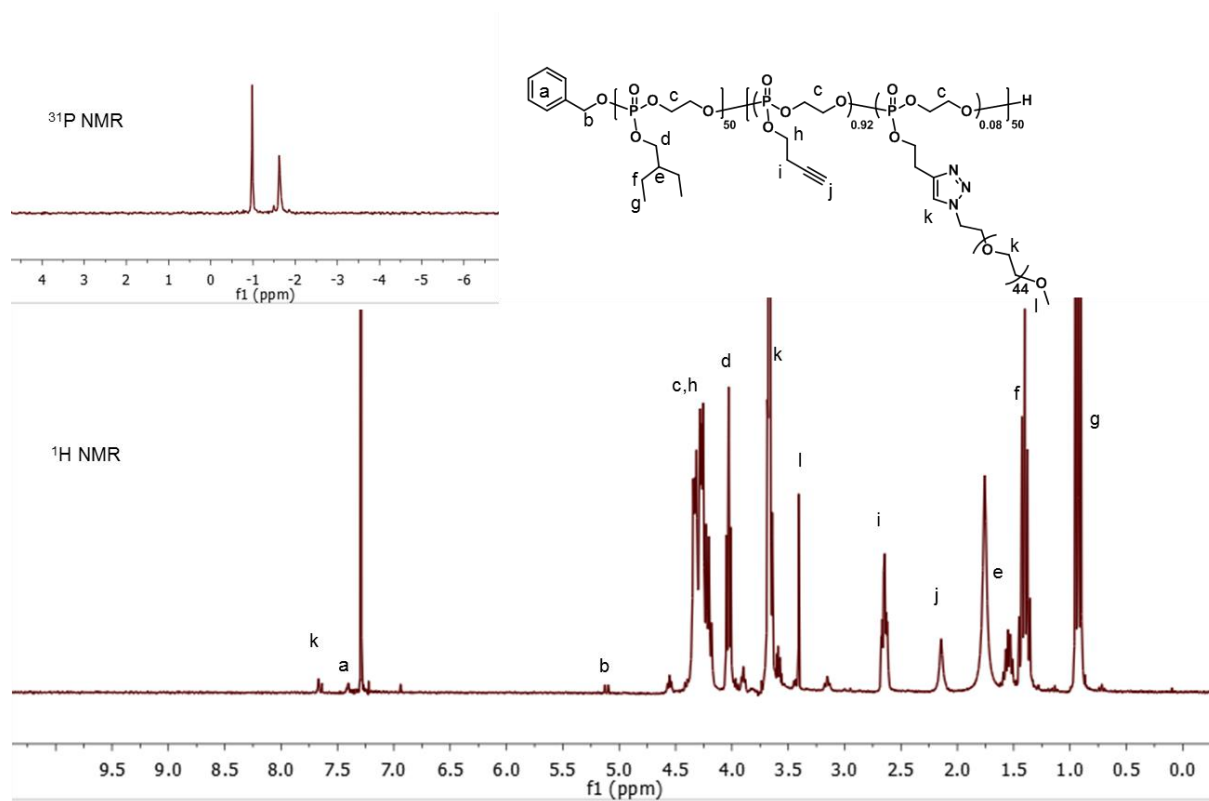

**Figure S2.**  $^1\text{H}$  NMR and  $^{31}\text{P}$  NMR of PEGylated terpolymer PEBP-*b*-PBYP-*g*-PEG

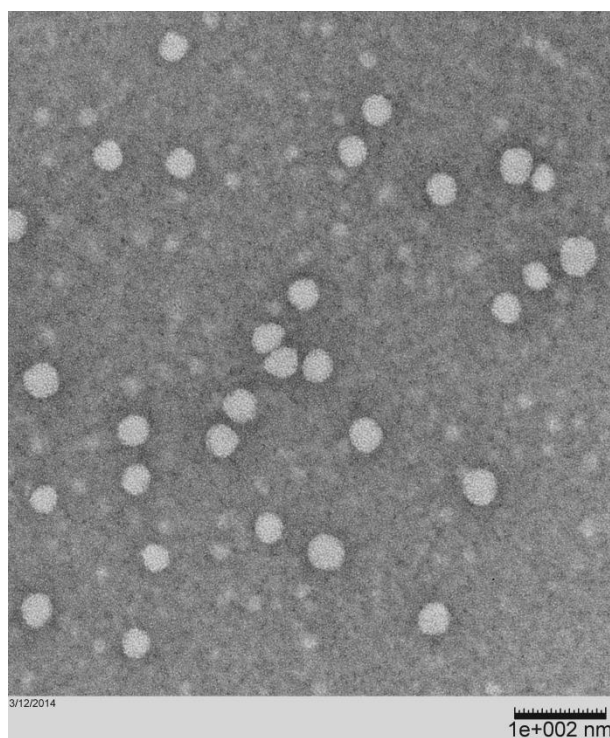

**Figure S3.** Transmission electron microscopy image of the paclitaxel-loaded nanoparticles.

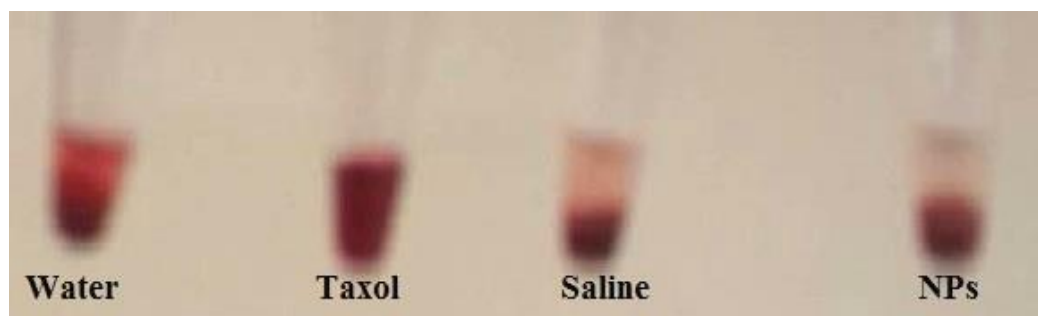

**Figure S4.** The effect of PTX-SOR-PPE nanoparticles and Taxol<sup>®</sup> solutions on freshly prepared suspension of red blood cells after incubation for 60 min at 37 °C in a shaking water bath at 300 rpm. The PPE nanoparticles tested concentrations are 0.5 mg/mL for paclitaxel and 0.5 mg/mL for sorafenib. Taxol<sup>®</sup> was used as the market mimicking formulation according to the manufacturer instructions (6 mg/mL paclitaxel).

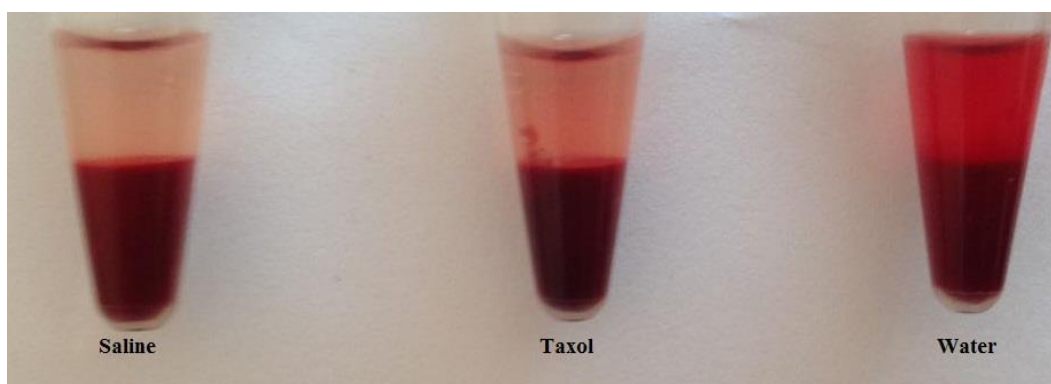

**Figure S5.** The effect of Taxol<sup>®</sup> solution on freshly prepared suspension of red blood cells after incubation for 60 min at 37 °C in a shaking water bath at 300 rpm. Taxol<sup>®</sup> was used as the market mimicking formulation according to the manufacturer instructions, but with slight modifications to contain 0.5 mg/mL paclitaxel and 0.5 mg/mL sorafenib.
